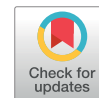

# Erratum

**Erratum. 2016 Presidential Address: Diabetes at 212°—Confronting the Invisible Disease. Diabetes Care 2016;39:1657–1663**

*Desmond Schatz*

DOI: 10.2337/dc17-er05a

In the article listed above, Fig. 1 required a reference in its legend. Reference 22 has been added to the legend of Fig. 1 and to the list of references:

22) Ask Manny Hernandez: % of time spent by people with diabetes with a medical professional in a year [Internet], 1 October 2015. Available from <http://askmanny.diabetesblogs.com/2015/10/of-time-spent-by-people-with-diabetes-with-a-medical-professional-in-a-year/>. Accessed 18 February 2017

The online version has been corrected to reflect these changes.
